# Supplementary material
Source: publisher figshare collection journal article supplement (https://tandf.figshare.com/articles/dataset/_/4004370)

|                   |   |   |   |   |
|-------------------|---|---|---|---|
| Morphine + Tat    | - | + | + | + |
| SiRNA <i>ULK1</i> | - | - | + | - |
| SiRNA Scrambled   | - | - | - | + |

ULK1

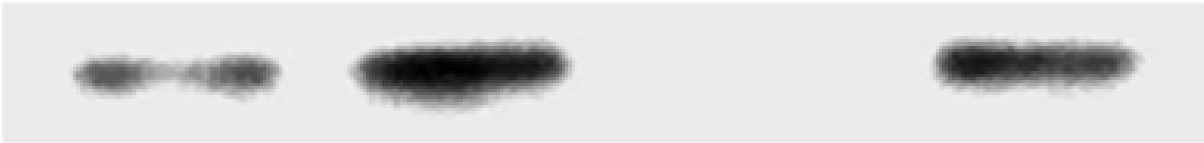

ACTB

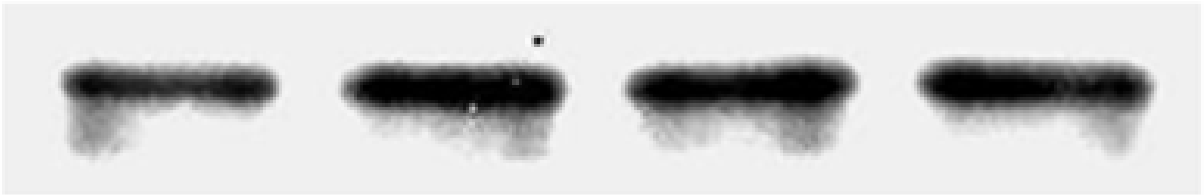

Supplement: Supplementary file 1 [file 1]
